# Supplementary material for: NUF2 Promotes Breast Cancer Development as a New Tumor Stem Cell Indicator
Source: MDPI journal article supplement (doi:10.3390/ijms24044226), 2023-02-20
Supplement: s1 [file s1]

Table S1

| Name                                  | Abbreviation |
|---------------------------------------|--------------|
| Bladder Urothelial Carcinoma          | BLCA         |
| Breast invasive carcinoma             | BRCA         |
| Cholangiocarcinoma                    | CHOL         |
| Colon adenocarcinoma                  | COAD         |
| Esophageal carcinoma                  | ESCA         |
| Head and Neck squamous cell carcinoma | HNSC         |
| Kidney renal clear cell carcinoma     | KIRC         |
| Kidney renal papillary cell carcinoma | KIRP         |
| Liver hepatocellular carcinoma        | LIHC         |
| Lung adenocarcinoma                   | LUAD         |
| Lung squamous cell carcinoma          | LUSC         |
| Prostate adenocarcinoma               | PRAD         |
| Rectum adenocarcinoma                 | READ         |
| Stomach adenocarcinoma                | STAD         |
| Thyroid carcinoma                     | THCA         |
| Uterine Corpus Endometrial Carcinoma  | UCEC         |

Table S2 The primers Sequences

| Gene name | Sequences 5'→3'          |
|-----------|--------------------------|
| KLF4(F)   | CAGCTTCACCTATCCGATCCG    |
| KLF4(R)   | GACTCCCTGCCATAGAGGAGG    |
| c-MYC(F)  | GCCAACTACTCTACTGTGGATT   |
| c-MYC(R)  | ATGCAGATGACTGTGTCGTT     |
| OCT4(F)   | GCTCGAGAAGGATGTGGTCC     |
| OCT4(R)   | CGTTGTGCATAGTCGCTGCT     |
| NANOG(F)  | ACCTATGCCTGTGATTTGTGG    |
| NANOG(R)  | AGTGGGTTGTTTGCCTTTGG     |
| NUF2(F)   | GGAAGGCTTCTTACCATTCAGC   |
| NUF2(R)   | GACTTGTC CGTTTTTGCTTTTGG |
| GAPDH(F)  | ACATCGCTCAGACACCATG      |
| GAPDH(R)  | TGTAGTTGAGGTCAATGAAGGG   |

Table S3 sh-NUF2 Sequences

| Name      | Sequence              |
|-----------|-----------------------|
| sh-NUF2-1 | CGAATGGAAGTATCAGAAGTA |
| sh-NUF2-2 | GAAGTATCAGAAGTACCAAAT |
| sh-NUF2-3 | GAAGTCATGTATCCACATTTA |
| sh-NUF2-4 | CTACATGAGAGCCTTACAAAT |
